# Supplementary material for: Spherical-micelle-driven deposition of high-speed impacting water droplets on superhydrophobic surfaces
Source: Royal Society of Chemistry journal article supplement (doi:10.1039/d2ta06767f), 2022-01-01
Supplement: d2ta06767f3.pdf [file d2ta06767f3.pdf]

**Supporting Information for Manuscript Entitled**  
**Spherical Micelle-Driven Deposition of High-Speed Impacting Water Droplets on**  
**Superhydrophobic Surfaces**

Yue Jiang<sup>†,§</sup>, Meina Wang<sup>†</sup>, Jinchao Wei<sup>‡</sup>, Yaxun Fan<sup>\*,†</sup>, and Yilin Wang<sup>\*,†,§</sup>

<sup>†</sup>*CAS Key Laboratory of Colloid, Interface and Chemical Thermodynamics, CAS Research/Education Center for Excellence in Molecular Sciences, Beijing National Laboratory for Molecular Sciences, and*

<sup>‡</sup>*Analysis and Test Center, Institute of Chemistry, Chinese Academy of Sciences, Beijing 100190, P. R. China*

<sup>§</sup>*University of Chinese Academy of Sciences, Beijing 100049, P. R. China*

\*Corresponding authors: yxfan@iccas.ac.cn; yilinwang@iccas.ac.cn

**Supplementary Figures**

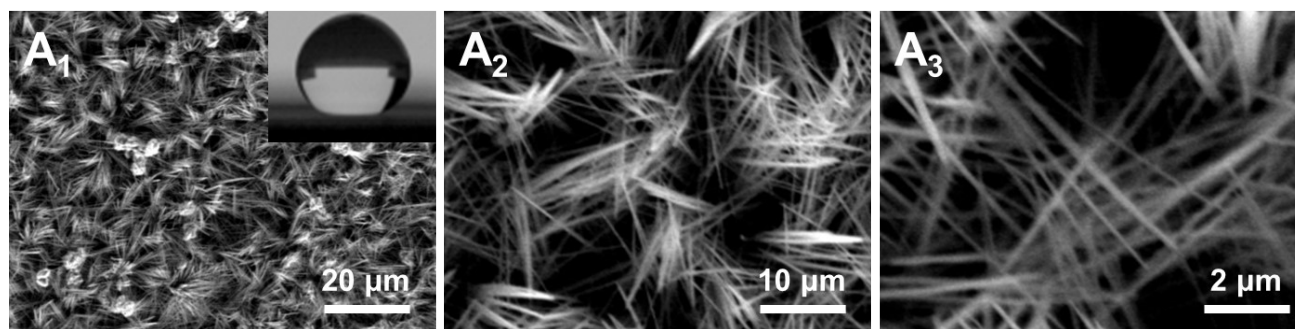

**Fig. S1** Environmental scanning electron microscope (ESEM) images of the microscopic structures of the copper superhydrophobic surface. Insert: water contact angle is  $156.9 \pm 2.6^\circ$ , ensuring the superhydrophobicity of the surface.

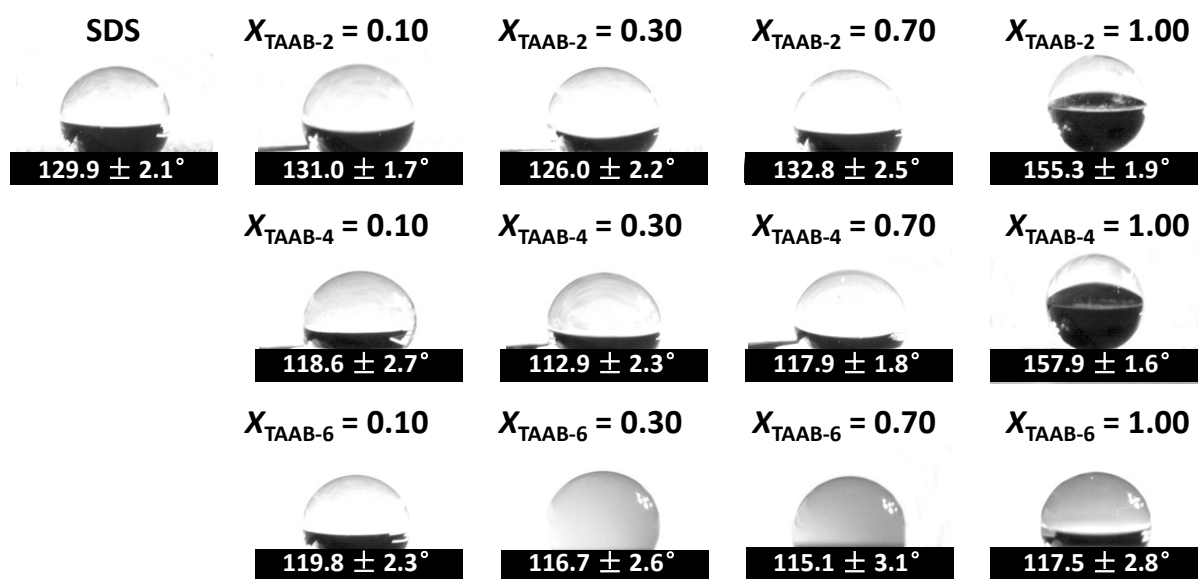

**Fig. S2** Contact angle of 25.0 mM TAAB-n/SDS droplets on a superhydrophobic surface.

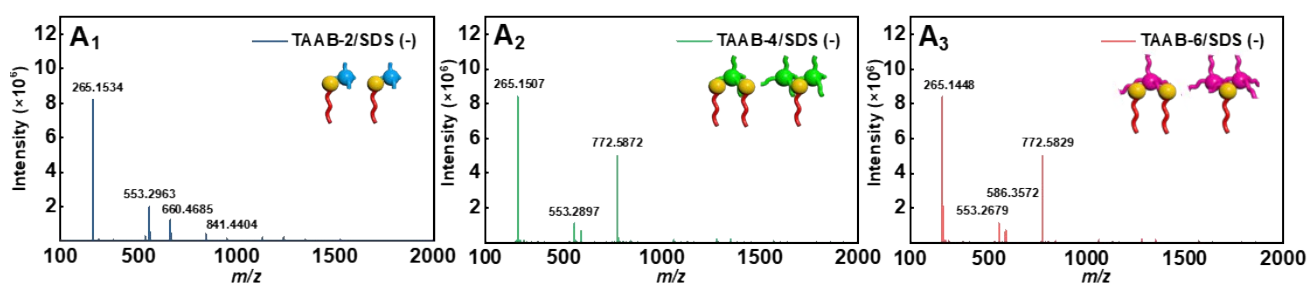

**Fig. S3** ESI mass spectra of 25.0 mM (A<sub>1</sub>) TAAB-2/SDS, (A<sub>2</sub>) TAAB-4/SDS and (A<sub>3</sub>) TAAB-6/SDS at  $X_{\text{TAAB-}n} = 0.30$  in negative ion mode.

## Captions for Supplementary Movies

**Supplementary Movie S1.** Videos of the impacting behavior of 25.0 mM TAAB-n/SDS ( $n = 2, 4, 6$ ) water droplets at the different molar ratios ( $X_{\text{TAAB-}n} = 0, 0.1, 0.3, 0.7, 1.0$ ) on a superhydrophobic surface (the impacting velocity is  $2.42 \text{ m}\cdot\text{s}^{-1}$ ).

**Supplementary Movie S2.** Videos of 25.0 mM TAAB-4/SDS droplets ( $X_{\text{TAAB-}4} = 0.3$ ) impacting on superhydrophobic surface from the different heights (40, 20 and 10 cm), corresponding to the velocity of  $2.80, 1.98$  and  $1.40 \text{ m}\cdot\text{s}^{-1}$ , respectively.
